# Supplementary material for: Determination of the energetics of formation of semiconductor/dendrimer nanohybrid materials: implications on the size and size distribution of nanocrystals
Source: Royal Society of Chemistry journal article supplement (doi:10.1039/c3ra47960a), 2014-01-01
Supplement: c3ra47960a.pdf [file c3ra47960a.pdf]

## Supplementary Information

### Determination of Energetics of Formation of Semiconductor/Dendrimer Nanohybrid Materials: Implications in Size and Size Distribution of Nanocrystals

Somrita Mondal, Debasmita Ghosh, Chandra Nath Roy and Abhijit Saha\*

UGC-DAE Consortium for Scientific Research, Kolkata Centre,  
III/LB-8, Bidhananagar, Kolkata-700098, India

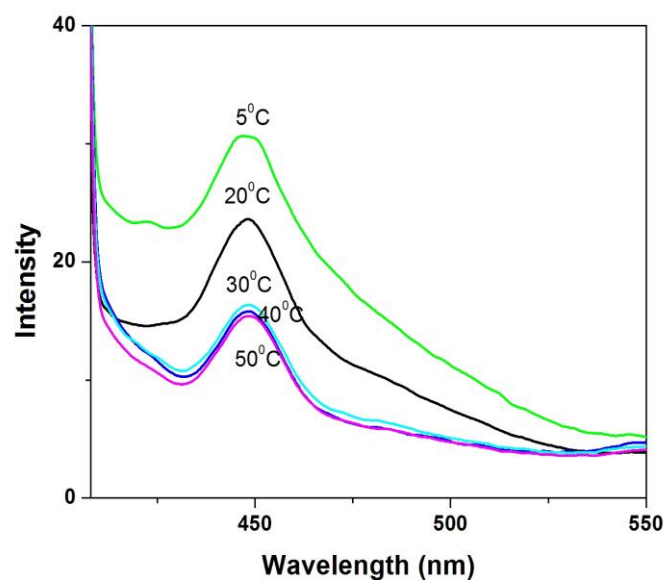

Figure S1. Luminescence spectra of CdS/dendrimer nanohybrids (collected from the reaction cell after completion of reaction) formed at different temperatures

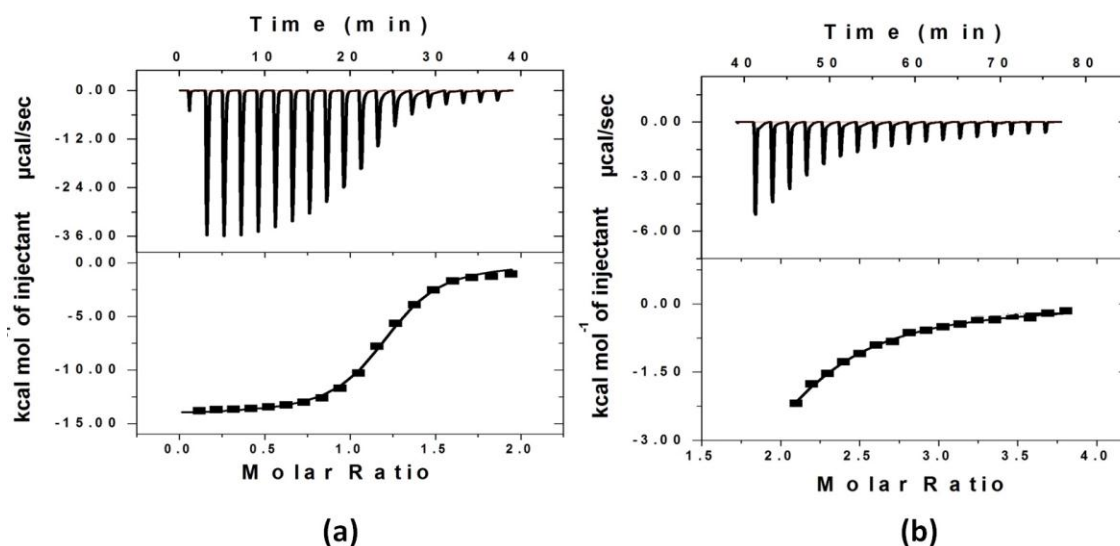

Figure S2. ITC thermogram for formation of CdS/Dendrimer nanohybrid with  $\text{Cd}^{2+} : \text{S}^{2-} = 1:20$ , (a) Phase I (b) Phase II

Table S1. Thermodynamic parameters for formation of ZnS/Dendrimer nanohybrid in phase I reaction at different temperatures

| Temp<br>(°C) | n    | K<br>(M <sup>-1</sup> )         | $\Delta H$ (kJ mol <sup>-1</sup> ) | $\Delta S$<br>(kJ mol <sup>-1</sup><br>K <sup>-1</sup> ) | $\Delta G$<br>(kJ mol <sup>-1</sup> ) | T $\Delta S$<br>(kJ mol <sup>-1</sup> ) |
|--------------|------|---------------------------------|------------------------------------|----------------------------------------------------------|---------------------------------------|-----------------------------------------|
| 5            | 1.40 | (1.85±0.08)<br>×10 <sup>4</sup> | -75.2 ±1.5                         | -0.19                                                    | -23.0                                 | -52.2                                   |
| 10           | 1.42 | (1.66±0.07)<br>×10 <sup>4</sup> | -74.3<br>±1.1                      | -0.18                                                    | -22.8                                 | -51.5                                   |
| 20           | 1.48 | (1.48±0.12)<br>×10 <sup>4</sup> | -63.8<br>±1.4                      | -0.14                                                    | -23.3                                 | -40.5                                   |
| 30           | 1.52 | (6.67±0.25)<br>×10 <sup>3</sup> | -33.2<br>±1.7                      | -0.04                                                    | -22.3                                 | -10.9                                   |
| 40           | 1.57 | (5.49±0.38)<br>×10 <sup>3</sup> | -31.2<br>±1.6                      | -0.02                                                    | -24.2                                 | -6.9                                    |

Table S2. Thermodynamic parameters for formation of ZnS/Dendrimer nanohybrid in phase I reaction for different ratio of  $Zn^{2+} : S^{2-}$ ; (a)  $Zn^{2+} : S^{2-} = 1:10$ , (b)  $Zn^{2+} : S^{2-} = 1:20$ , (c)  $Zn^{2+} : S^{2-} = 1:30$

| $Zn^{2+}:S^{2-}$ | n   | K<br>( $M^{-1}$ )                   | $\Delta H$<br>( $kJ mol^{-1}$ )      | $\Delta S$<br>( $kJ mol^{-1} K^{-1}$ ) | $\Delta G$<br>( $kJ mol^{-1}$ ) | T $\Delta S$<br>( $kJ mol^{-1}$ ) |
|------------------|-----|-------------------------------------|--------------------------------------|----------------------------------------|---------------------------------|-----------------------------------|
| 1:10             | 1.4 | ( $1.3 \pm 0.08$ )<br>$\times 10^4$ | ( $-1.6 \pm 0.09$ )<br>$\times 10^4$ | -0.16                                  | -21.9                           | -45.4                             |
| 1:20             | 1.2 | ( $1.0 \pm 0.06$ )<br>$\times 10^4$ | ( $-2.0 \pm 0.08$ )<br>$\times 10^4$ | -0.22                                  | -21.4                           | -62.6                             |
| 1:30             | 1.3 | ( $6.3 \pm 0.03$ )<br>$\times 10^3$ | ( $-2.3 \pm 0.09$ )<br>$\times 10^4$ | -0.27                                  | -20.3                           | -76.2                             |
